# Supplementary material for: Cohort profile: the MCC-Spain follow-up on colorectal, breast and prostate cancers: study design and initial results
Source: PubMed Central journal article supplement — BMJ Open. 2019 Nov 21;9(11):e031904. doi: 10.1136/bmjopen-2019-031904 (PMC6887054; doi:10.1136/bmjopen-2019-031904), 2019-11-21
Supplement: bmjopen-2019-031904supp001.pdf [file bmjopen-2019-031904supp001.pdf]

Supplementary Table 1. Provinces and hospital of recruitment

| Province  | Hospital                                                 | Colorectal cancer | Breast cancer | Prostate cancer |
|-----------|----------------------------------------------------------|-------------------|---------------|-----------------|
| Asturias  | Hospital de Cabueñes                                     | 77                | 70            | 16              |
| Barcelona | Hospital Clinic                                          | 69                | 47            | 53              |
| Barcelona | Hospital de Bellvitge – ICO                              | 375               | 109           | -               |
| Barcelona | Hospital del Mar                                         | 222               | 136           | 152             |
| Barcelona | Hospital Germans Trias i Pujol                           | 30                | -             | 199             |
| Cantabria | Hospital Universitario Marqués de Valdecilla             | 151               | 141           | 175             |
| Gipuzkoa  | Hospital Donostia                                        | 119               | 126           | -               |
| Gipuzkoa  | Instituto Oncológico                                     | -                 | 100           | -               |
| Girona    | Hospital Dr. Josep Trueta                                | -                 | 21            | -               |
| Girona    | Hospital Santa Caterina                                  | -                 | 26            | -               |
| Granada   | Hospital San Cecilio                                     | 164               | -             | 64              |
| Huelva    | Hospital Infanta Elena                                   | 16                | 24            | 16              |
| Huelva    | Hospital Juan Ramón Jiménez                              | 55                | 84            | 36              |
| León      | Hospital de León                                         | 390               | 226           | -               |
| Madrid    | Hospital La Paz                                          | 110               | 164           | 155             |
| Madrid    | Hospital Ramón y Cajal                                   | 122               | 177           | 160             |
| Murcia    | Hospital Morales Messeguer                               | 34                | -             | -               |
| Navarra   | Complejo Hospitalario de Navarra A (Hospital de Navarra) | 76                | 112           | -               |
| Navarra   | Complejo Hospitalario de Navarra B (Virgen del Camino)   | 49                | 114           | -               |
| Valencia  | Hospital Dr. Peset                                       | 25                | 4             | -               |
| Valencia  | Hospital La Fe                                           | 56                | 57            | 86              |
| TOTAL     |                                                          | 2140              | 1738          | 1112            |

Supplementary Table 2. Previous results in the MCC-Spain study

| Supp. Reference | Journal                 | Year of publication | Cancer                                     | Exposure                                                  |
|-----------------|-------------------------|---------------------|--------------------------------------------|-----------------------------------------------------------|
| 1               | Environ Res             | 2012                | NA                                         | Disinfection by-products in municipal drinking water      |
| 2               | Gac Sanit               | 2012                | Breast, prostate                           | Screening practices and lifestyles                        |
| 3               | BJU Int                 | 2012                | Prostate                                   | Anogenital distance                                       |
| 4               | Gac Sanit               | 2013                | NA                                         | Nitrate and trace elements in municipal and bottled water |
| 5               | Int J Cancer            | 2015                | Prostate                                   | Night shift work and chronotype                           |
| 6               | Gac Sanit               | 2015                | Colorectal, breast, prostate, gastric, CLL | Rational and study design for case-control                |
| 7               | J Gen Virol             | 2015                | CLL                                        | Polyomaviruses                                            |
| 8               | Infect Agent Cancer     | 2015                | CLL                                        | Aberrant Epstein-Barr virus                               |
| 9               | Menopause               | 2015                | NA                                         | Hormonal contraception and postmenopausal hormone therapy |
| 10              | Sci Total Environ       | 2015                | NA                                         | Persistent organic pollutants in adult population         |
| 11              | Acta Diabetol           | 2016                | Breast                                     | Diabetes and diabetes treatment                           |
| 12              | Eur J Epidemiol         | 2016                | Breast                                     | Night shift work                                          |
| 13              | Int J Cancer            | 2016                | Colorectal                                 | Streptococcus gallolyticus                                |
| 14              | Cancer Epidemiol        | 2016                | Breast                                     | Perinatal and childhood factors                           |
| 15              | Environ Health Perspect | 2016                | Breast                                     | Ingested nitrate                                          |
| 16              | Int J Cancer            | 2016                | Colorectal                                 | Ingested nitrate                                          |
| 17              | Environ Health Perspect | 2016                | Breast                                     | Xenoestrogen burden                                       |
| 18              | Occup Environ Med       | 2016                | Gastric                                    | Night shift work                                          |
| 19              | Cancer Epidemiol        | 2016                | Prostate                                   | Perinatal and childhood factors                           |
| 20              | Int J Cancer            | 2016                | CLL                                        | Night shift work                                          |
| 21              | PLoS One                | 2016                | Breast                                     | Antihypertensive medication                               |
| 22              | BMC Cancer              | 2016                | Breast                                     | Non-steroidal anti-inflammatory drugs                     |
| 23              | PLoS One                | 2016                | Colorectal, gastric                        | Menstrual and reproductive factors                        |
| 24              | Eur J Nutr              | 2017                | CLL                                        | Fruit and vegetable intake and vit C transporter gene     |
| 25              | Environ Health Perspect | 2017                | Colorectal                                 | Trihalomethanes in drinking water                         |

|    |                             |      |                              |                                                    |
|----|-----------------------------|------|------------------------------|----------------------------------------------------|
| 26 | Prev Med                    | 2017 | Colorectal                   | Drugs affecting renin-angiotensin system           |
| 27 | Sci Rep                     | 2017 | Colorectal                   | Environmental and genetic factors                  |
| 28 | Scand J Work Environ Health | 2017 | Colorectal                   | Shift work                                         |
| 29 | Int J Cancer                | 2017 | Colorectal, breast, prostate | Nutrition-based cancer prevention guidelines       |
| 30 | Front Microbiol             | 2017 | Colorectal                   | Helicobacter pylori                                |
| 31 | PLoS One                    | 2017 | Gastric                      | Physical activity                                  |
| 32 | Helicobacter                | 2017 | NA                           | Helicobacter pylori in adult population            |
| 33 | Maturitas                   | 2017 | Breast                       | Dietary patterns                                   |
| 34 | Sci Rep                     | 2017 | Prostate                     | Environmental and genetic factors                  |
| 35 | Cancer Epidemiol            | 2017 | Gastric                      | Helicobacter pylori                                |
| 36 | BMC Med Genet               | 2017 | Colorectal                   | SMAD7 gene and Mediterranean diet                  |
| 37 | Gastric Cancer              | 2018 | Gastric                      | Dietary patterns                                   |
| 38 | Eur J Nutr                  | 2018 | Colorectal                   | Meat intake, cooking methods and doneness          |
| 39 | J Urol                      | 2018 | Prostate                     | Dietary patterns                                   |
| 40 | Environ Int                 | 2018 | Breast                       | Trihalomethanes in drinking water                  |
| 41 | Cancer Epidemiol            | 2018 | CLL                          | CLL etiology (review)                              |
| 42 | Sci Rep                     | 2018 | Colorectal                   | Chondroitin sulphate and glucosamine               |
| 43 | Sci Rep                     | 2018 | Breast                       | Risk score                                         |
| 44 | Environ Pollut              | 2018 | Breast                       | Residential proximity to industrial installations  |
| 45 | BMC Cancer                  | 2018 | Breast                       | Reproductive factors and genetic hormonal pathways |
| 46 | Maturitas                   | 2018 | Breast                       | Meat intake, methods of cooking                    |
| 47 | J Steroid Biochem Mol Biol  | 2018 | Breast                       | Vitamin D                                          |
| 48 | Environ Health Perspect     | 2018 | Breast, prostate             | Artificial light-at-night                          |
| 49 | Haematologica               | 2018 | CLL                          | Dietary patterns                                   |
| 50 | Int J Cancer                | 2018 | Breast, prostate             | Mistimed eating patterns                           |
| 51 | Stat Methods Med Res        | 2018 | NA                           | Compositional analysis of dietary patterns         |
| 52 | Int J Hyg Environ Health    | 2018 | Breast                       | Residential proximity to green spaces              |
| 53 | PLoS One                    | 2018 | Breast, prostate             | Pigmentation phototype                             |
| 54 | BMC Public Health           | 2018 | NA                           | Non-steroidal anti-inflammatory drugs consumption  |
| 55 | Environ Int                 | 2018 | Colorectal                   | Sun exposure and vit D                             |

|    |                         |      |                    |                                                                           |
|----|-------------------------|------|--------------------|---------------------------------------------------------------------------|
| 56 | Nutrients               | 2018 | Prostate           | Dietary zinc                                                              |
| 57 | Eur J Nutr              | 2019 | Colorectal         | Dietary patterns                                                          |
| 58 | Eur J Nutr              | 2019 | Colorectal         | Dietary non-enzymatic antioxidant capacity                                |
| 59 | Br J Haematol           | 2019 | CLL                | Insulin-like growth factor                                                |
| 60 | Eur J Cancer Prev       | 2019 | NA                 | Helicobacter pylori seroprevalence                                        |
| 61 | Environ Int             | 2019 | Breast, prostate   | Alkylphenolic compounds                                                   |
| 62 | Nutrients               | 2019 | NA                 | Mediterranean diet                                                        |
| 63 | Nutrients               | 2019 | Gastric            | Flavonoids                                                                |
| 64 | Eur J Nutr              | 2019 | Breast             | Fatty acid intake                                                         |
| 65 | Cancer Epidemiol        | 2019 | Gastric            | Epstein-Barr virus                                                        |
| 66 | Int J Cancer            | 2019 | Prostate           | Cessation of night shift work                                             |
| 67 | Nutrients               | 2019 | Colorectal, breast | Dietary inflammatory index and dietary non-enzymatic antioxidant capacity |
| 68 | Breast Cancer Res Treat | 2019 | Breast             | Physical activity                                                         |
| 69 | Sci Rep                 | 2019 | Colorectal         | Flagelin C and Streptococcus gallolyticus proteins                        |

CLL: Chronic lymphocytic leukaemia. NA: Not applicable

**Supplementary reference list**

1. Villanueva CM, Castaño-Vinyals G, Moreno V, et al. Concentrations and correlations of disinfection by-products in municipal drinking water from an exposure assessment perspective. *Environ Res.* 2012;114:1-11. doi: 10.1016/j.envres.2012.02.002.
2. Perea MD, Castaño-Vinyals G, Altzibar JM, et al. [Cancer screening practices and associated lifestyles in population controls of the Spanish multi-case control study]. *Gac Sanit.* 2012;26:301-10. doi: 10.1016/j.gaceta.2012.01.020.
3. Castaño-Vinyals G, Carrasco E, Lorente JA, et al. Anogenital distance and the risk of prostate cancer. *BJU Int.* 2012;110(11 Pt B):E707-10. doi: 10.1111/j.1464-410X.2012.11516.x.
4. Espejo-Herrera N, Kogevinas M, Castaño-Vinyals G, et al and Multicase Control Study of Cancer (MCC)-Spain Water Working Group. Nitrate and trace elements in municipal and bottled water in Spain. *Gac Sanit.* 2013 Mar-Apr;27(2):156-60. doi:10.1016/j.gaceta.2012.02.002.
5. Papantoniou K, Castaño-Vinyals G, Espinosa A, et al. Night shift work, chronotype and prostate cancer risk in the MCC-Spain case-control study. *Int J Cancer.* 2015;137:1147-57. doi: 10.1002/ijc.29400.
6. Castaño-Vinyals G, Aragonés N, Pérez-Gómez B, et al and MCC-Spain Study Group. Population-based multicase-control study in common tumors in Spain (MCC-Spain): rationale and study design. *Gac Sanit.* 2015;29:308-15. doi: 10.1016/j.gaceta.2014.12.003.
7. Robles C, Casabonne D, Benavente Y, et al. Seroreactivity against Merkel cell polyomavirus and other polyomaviruses in chronic lymphocytic leukaemia, the MCC-Spain study. *J Gen Virol.* 2015;96:2286-92. doi: 10.1099/vir.0.000167.
8. Casabonne D, Benavente Y, Robles C, et al. Aberrant Epstein-Barr virus antibody patterns and chronic lymphocytic leukemia in a Spanish multicentric case-control study. *Infect Agent Cancer.* 2015;10:5. doi: 10.1186/1750-9378-10-5.
9. Costas L, Sequera VG, Quesada P, et al. Hormonal contraception and postmenopausal hormone therapy in Spain: time trends and patterns of use. *Menopause.* 2015;22:1138-46. doi: 10.1097/GME.0000000000000487.
10. Fernández-Rodríguez M, Arrebola JP, Artacho-Cordón F, et al. Levels and predictors of persistent organic pollutants in an adult population from four Spanish regions. *Sci Total Environ.* 2015;538:152-61. doi: 10.1016/j.scitotenv.2015.07.162.
11. García-Esquinas E, Guinó E, Castaño-Vinyals G, et al. Association of diabetes and diabetes treatment with incidence of breast cancer. *Acta Diabetol.* 2016;53:99-107. doi: 10.1007/s00592-015-0756-6.
12. Papantoniou K, Castaño-Vinyals G, Espinosa A, et al. Breast cancer risk and night shift work in a case-control study in a Spanish population. *Eur J Epidemiol.* 2016;31:867-78. doi: 10.1007/s10654-015-0073-y.

13. Butt J, Romero-Hernández B, Pérez-Gómez B, et al. Association of *Streptococcus gallolyticus* subspecies *gallolyticus* with colorectal cancer: Serological evidence. *Int J Cancer*. 2016;138:1670-9. doi: 10.1002/ijc.29914.
14. Lope V, García-Esquinas E, Pérez-Gómez B, et al. Perinatal and childhood factors and risk of breast cancer subtypes in adulthood. *Cancer Epidemiol*. 2016;40:22-30. doi: 10.1016/j.canep.2015.11.004.
15. Espejo-Herrera N, Gracia-Lavedan E, Pollan M, et al. Ingested Nitrate and Breast Cancer in the Spanish Multicase-Control Study on Cancer (MCC-Spain). *Environ Health Perspect*. 2016;124:1042-9. doi: 10.1289/ehp.1510334.
16. Espejo-Herrera N, Gràcia-Lavedan E, Boldo E, et al. Colorectal cancer risk and nitrate exposure through drinking water and diet. *Int J Cancer*. 2016;139:334-46. doi: 10.1002/ijc.30083.
17. Pastor-Barriuso R, Fernández MF, Castaño-Vinyals G, et al. Total Effective Xenoestrogen Burden in Serum Samples and Risk for Breast Cancer in a Population-Based Multicase-Control Study in Spain. *Environ Health Perspect*. 2016;124:1575-1582.
18. Gyarmati G, Turner MC, Castaño-Vinyals G, et al. Night shift work and stomach cancer risk in the MCC-Spain study. *Occup Environ Med*. 2016;73:520-7. doi: 10.1136/oemed-2016-103597.
19. Lope V, García-Esquinas E, Ruiz-Dominguez JM, et al. Perinatal and childhood factors and risk of prostate cancer in adulthood: MCC-Spain case-control study. *Cancer Epidemiol*. 2016;43:49-55. doi: 10.1016/j.canep.2016.06.012.
20. Costas L, Benavente Y, Olmedo-Requena R, et al. Night shift work and chronic lymphocytic leukemia in the MCC-Spain case-control study. *Int J Cancer*. 2016;139:1994-2000. doi: 10.1002/ijc.30272.
21. Gómez-Acebo I, Dierssen-Sotos T, Palazuelos C, et al. The Use of Antihypertensive Medication and the Risk of Breast Cancer in a Case-Control Study in a Spanish Population: The MCC-Spain Study. *PLoS One*. 2016;11:e0159672. doi: 10.1371/journal.pone.0159672.
22. Dierssen-Sotos T, Gómez-Acebo I, de Pedro M, et al. Use of non-steroidal anti-inflammatory drugs and risk of breast cancer: The Spanish Multi-Case-control (MCC) study. *BMC Cancer*. 2016;16:660. doi: 10.1186/s12885-016-2692-4.
23. Lope V, Fernández de Larrea N, Pérez-Gómez B, et al. Menstrual and Reproductive Factors and Risk of Gastric and Colorectal Cancer in Spain. *PLoS One*. 2016;11:e0164620. doi: 10.1371/journal.pone.0164620.
24. Casabonne D, Gracia E, Espinosa A, et al. Fruit and vegetable intake and vitamin C transporter gene (SLC23A2) polymorphisms in chronic lymphocytic leukaemia. *Eur J Nutr*. 2017;56:1123-1133. doi: 10.1007/s00394-016-1162-8.
25. Villanueva CM, Gracia-Lavedan E, Bosetti C, et al. Colorectal Cancer and Long-Term Exposure to Trihalomethanes in Drinking Water: A Multicenter Case-Control Study in Spain and Italy. *Environ Health Perspect*. 2017;125:56-65. doi: 10.1289/EHP155.

26. Dierssen-Sotos T, Gómez-Acebo I, Palazuelos C, et al. Relationship between drugs affecting the renin-angiotensin system and colorectal cancer: The MCC-Spain study. *Prev Med.* 2017;99:178-184. doi: 10.1016/j.ypmed.2017.01.011.
27. Ibáñez-Sanz G, Díez-Villanueva A, Alonso MH, et al. Risk Model for Colorectal Cancer in Spanish Population Using Environmental and Genetic Factors: Results from the MCC-Spain study. *Sci Rep.* 2017;7:43263. doi: 10.1038/srep43263.
28. Papantoniou K, Castaño-Vinyals G, Espinosa A, et al. Shift work and colorectal cancer risk in the MCC-Spain case-control study. *Scand J Work Environ Health.* 2017;43:250-259. doi: 10.5271/sjweh.3626.
29. Romaguera D, Gracia-Lavedan E, Molinuevo A, et al. Adherence to nutrition-based cancer prevention guidelines and breast, prostate and colorectal cancer risk in the MCC-Spain case-control study. *Int J Cancer.* 2017;141:83-93. doi: 10.1002/ijc.30722.
30. Fernández de Larrea-Baz N, Michel A, Romero B, et al. Helicobacter pylori Antibody Reactivities and Colorectal Cancer Risk in a Case-control Study in Spain. *Front Microbiol.* 2017 29;8:888. doi: 10.3389/fmicb.2017.00888. Huerta JM, Chirlaque MD, Molina AJ, et al. Physical activity domains and risk of gastric adenocarcinoma in the MCC-Spain case-control study. *PloS One.* 2017;12:e0179731. doi: 10.1371/journal.pone.0179731.
31. Huerta JM, Chirlaque MD, Molina AJ, et al. Physical activity domains and risk of gastric adenocarcinoma in the MCC-Spain case-control study. *PloS one.* 2017;12(7): e0179731. doi: 10.1371/journal.pone.0179731
32. Fernández-de-Larrea N, Michel A, Romero B, et al. Antibody reactivity against Helicobacter pylori proteins in a sample of the Spanish adult population in 2008-2013. *Helicobacter.* 2017;22. doi: 10.1111/hel.12401.
33. Castelló A, Boldo E, Pérez-Gómez B, et al. Adherence to the Western, Prudent and Mediterranean dietary patterns and breast cancer risk: MCC-Spain study. *Maturitas.* 2017;103:8-15. doi: 10.1016/j.maturitas.2017.06.020.
34. Gómez-Acebo I, Dierssen-Sotos T, Fernandez-Navarro P, et al. Risk Model for Prostate Cancer Using Environmental and Genetic Factors in the Spanish Multi-Case-Control (MCC) Study. *Sci Rep.* 2017;7:8994. doi: 10.1038/s41598-017-09386-9.
35. Fernández de Larrea-Baz N, Pérez-Gómez B, Michel A, et al. Helicobacter pylori serological biomarkers of gastric cancer risk in the MCC-Spain case-control Study. *Cancer Epidemiol.* 2017;50(Pt A):76-84. doi: 10.1016/j.canep.2017.08.002.
36. Alonso-Molero J, González-Donquiles C, Palazuelos C, et al. The RS4939827 polymorphism in the SMAD7 GENE and its association with Mediterranean diet in colorectal carcinogenesis. *BMC Med Genet.* 2017;18:122. doi: 10.1186/s12881-017-0485-5.
37. Castelló A, Fernández de Larrea N, Martín V, et al and MCC-Spain researchers. High adherence to the Western, Prudent, and Mediterranean dietary patterns and risk of gastric adenocarcinoma: MCC-Spain study. *Gastric Cancer.* 2018;21:372-382. doi: 10.1007/s10120-017-0774-x.

38. de Batlle J, Gracia-Lavedan E, Romaguera D, et al. Meat intake, cooking methods and doneness and risk of colorectal tumours in the Spanish multicase-control study (MCC-Spain). *Eur J Nutr*. 2018;57:643-653. doi: 10.1007/s00394-016-1350-6.
39. Castelló A, Boldo E, Amiano P, et al and MCC-Spain Researchers. Mediterranean Dietary Pattern is Associated with Low Risk of Aggressive Prostate Cancer: MCC-Spain Study. *J Urol*. 2018;199:430-437. doi: 10.1016/j.juro.2017.08.087.
40. Font-Ribera L, Gràcia-Lavedan E, Aragonés N, et al. Long-term exposure to trihalomethanes in drinking water and breast cancer in the Spanish multicase-control study on cancer (MCC-SPAIN). *Environ Int*. 2018;112:227-234. doi: 10.1016/j.envint.2017.12.031.
41. Benavente Y, Casabonne D, Costas L, et al. Established and suggested exposures on CLL/SLL etiology: Results from the CLL-MCC-Spain study. *Cancer Epidemiol*. 2018;52:106-111. doi: 10.1016/j.canep.2017.12.012.
42. Ibáñez-Sanz G, Díez-Villanueva A, Vilorio-Marqués L, et al. Possible role of chondroitin sulphate and glucosamine for primary prevention of colorectal cancer. Results from the MCC-Spain study. *Sci Rep*. 2018;8:2040. doi: 10.1038/s41598-018-20349-6.
43. Dierssen-Sotos T, Gómez-Acebo I, Palazuelos C, et al. Validating a breast cancer score in Spanish women. The MCC-Spain study. *Sci Rep*. 2018;8:3036. doi: 10.1038/s41598-018-20832-0.
44. García-Pérez J, Lope V, Pérez-Gómez B, et al. Risk of breast cancer and residential proximity to industrial installations: New findings from a multicase-control study (MCC-Spain). *Environ Pollut*. 2018;237:559-568. doi: 10.1016/j.envpol.2018.02.065.
45. Dierssen-Sotos T, Palazuelos-Calderón C, Jiménez-Moleón JJ, et al. Reproductive risk factors in breast cancer and genetic hormonal pathways: a gene-environment interaction in the MCC-Spain project. *BMC Cancer*. 2018;18:280. doi: 10.1186/s12885-018-4182-3.
46. Boldo E, Castelló A, Aragonés N, et al and MCC-Spain researchers. Meat intake, methods and degrees of cooking and breast cancer risk in the MCC-Spain study. *Maturitas*. 2018;110:62-70. doi: 10.1016/j.maturitas.2018.01.020.
47. Lope V, Castelló A, Mena-Bravo A, et al. Serum 25-hydroxyvitamin D and breast cancer risk by pathological subtype (MCC-Spain). *J Steroid Biochem Mol Biol*. 2018;182:4-13. doi: 10.1016/j.jsbmb.2018.04.005.
48. Garcia-Saenz A, Sánchez de Miguel A, Espinosa A, et al. Evaluating the Association between Artificial Light-at-Night Exposure and Breast and Prostate Cancer Risk in Spain (MCC-Spain Study). *Environ Health Perspect*. 2018;126:047011. doi: 10.1289/EHP1837.
49. Solans M, Castelló A, Benavente Y, et al. Adherence to the Western, Prudent, and Mediterranean dietary patterns and chronic lymphocytic leukemia in the MCC-Spain study. *Haematologica*. 2018;103:1881-1888. doi: 10.3324/haematol.2018.192526.
50. Kogevinas M, Espinosa A, Castelló A, et al. Effect of mistimed eating patterns on breast and prostate cancer risk (MCC-Spain Study). *Int J Cancer*. 2018;143:2380-2389. doi: 10.1002/ijc.31649.



51. Solans M, Coenders G, Marcos-Gragera R, et al. Compositional analysis of dietary patterns. *Stat Methods Med Res.* 2018 (In press). doi: 10.1177/0962280218790110.
52. O'Callaghan-Gordo C, Kogevinas M, Cirach M, et al. Residential proximity to green spaces and breast cancer risk: The multicase-control study in Spain (MCC-Spain). *Int J Hyg Environ Health.* 2018;221:1097-1106. doi: 10.1016/j.ijheh.2018.07.014.
53. Gómez-Acebo I, Dierssen-Sotos T, Palazuelos C, et al. Pigmentation phototype and prostate and breast cancer in a select Spanish population-A Mendelian randomization analysis in the MCC-Spain study. *PloS One.* 2018;13:e0201750. doi: 10.1371/journal.pone.0201750.
54. Gómez-Acebo I, Dierssen-Sotos T, de Pedro M, et al. The MCC-Spain study. *BMC Public Health.* 2018;18:1134. doi: 10.1186/s12889-018-6019-z.
55. Vallès X, Alonso MH, López-Caleya JF, et al. Colorectal cancer, sun exposure and dietary vitamin D and calcium intake in the MCC-Spain study. *Environ Int.* 2018 Dec;121(Pt 1):428-434. doi: 10.1016/j.envint.2018.09.030.
56. Gutiérrez-González E, Castelló A, Fernández-Navarro P, et al. Dietary Zinc and Risk of Prostate Cancer in Spain: MCC-Spain Study. *Nutrients.* 2018 Dec 20;11. pii: E18. doi: 10.3390/nu11010018.
57. Castelló A, Amiano P, Fernández de Larrea N, et al and MCC-Spain researchers. Low adherence to the western and high adherence to the mediterranean dietary patterns could prevent colorectal cancer. *Eur J Nutr.* 2019;58:1495-1505. doi: 10.1007/s00394-018-1674-5.
58. Amiano P, Molina-Montes E, Molinuevo A, et al. Association study of dietary non-enzymatic antioxidant capacity (NEAC) and colorectal cancer risk in the Spanish Multicase-Control Cancer (MCC-Spain) study. *Eur J Nutr.* 2019;58:2229-2242. doi: 10.1007/s00394-018-1773-3.
59. Casabonne D, Benavente Y, Costas L, et al. Insulin-like growth factor levels and chronic lymphocytic leukaemia: results from the MCC-Spain and EpiLymph-Spain studies. *Br J Haematol.* 2019;185:608-612. doi: 10.1111/bjh.15583.
60. Lorenzo I, Fernández-de-Larrea N, Michel A, et al. Helicobacter pylori seroprevalence in Spain: influence of adult and childhood sociodemographic factors. *Eur J Cancer Prev.* 2019;28:294-303. doi: 10.1097/CEJ.0000000000000483.
61. Peremiquel-Trillas P, Benavente Y, Martín-Bustamante M, et al. Alkylphenolic compounds and risk of breast and prostate cancer in the MCC-Spain study. *Environ Int.* 2019;122:389-399. doi: 10.1016/j.envint.2018.12.007.
62. Olmedo-Requena R, González-Donquiles C, et al. Agreement among Mediterranean Diet Pattern Adherence Indexes: MCC-Spain Study. *Nutrients.* 2019;11(3). pii: E488. doi: 10.3390/nu11030488.
63. Vitelli Storelli F, Molina AJ, Zamora-Ros R, et al. Flavonoids and the Risk of Gastric Cancer: An Exploratory Case-Control Study in the MCC-Spain Study. *Nutrients.* 2019;11(5). pii: E967. doi: 10.3390/nu11050967.

64. Dierssen-Sotos T, Gómez-Acebo I, Palazuelos C, et al. Fatty acid intake and breast cancer in the Spanish multicase-control study on cancer (MCC-Spain). *Eur J Nutr*. 2019 (In press). doi: 10.1007/s00394-019-01977-8.
65. Aragonés N, Fernández de Larrea N, Pastor-Barriuso R, et al. Epstein Barr virus antibody reactivity and gastric cancer: A population-based case-control study. *Cancer Epidemiol*. 2019;61:79-88. doi: 10.1016/j.canep.2019.05.008.
66. Kogevinas M, Espinosa A, Papantoniou K, et al. Prostate cancer risk decreases following cessation of night shift work. *Int J Cancer*. 2019 (In press). doi: 10.1002/ijc.32528.
67. Obón-Santacana M, Romaguera D, Gracia-Lavedan E, et al. Dietary Inflammatory Index, Dietary Non-Enzymatic Antioxidant Capacity, and Colorectal and Breast Cancer Risk (MCC-Spain Study). *Nutrients*. 2019;11. pii: E1406. doi: 10.3390/nu11061406.
68. Huerta JM, Molina AJ, Chirlaque MD, et al. Domain-specific patterns of physical activity and risk of breast cancer sub-types in the MCC-Spain study. *Breast Cancer Res Treat*. 2019 (In press). doi: 10.1007/s10549-019-05358-x.
69. Butt J, Fernández de Larrea N, et al. Antibody responses to flagellin C and *Streptococcus gallolyticus* pilus proteins in colorectal cancer. *Sci Rep*. 2019;9:10847. doi: 10.1038/s41598-019-47347-6.
